# Supplementary material for: First Report on the Molecular Phylogenetics and Population Genetics of Aedes Lineatopennis (Ludlow) in the World
Source: Research Square preprint supplement (doi:10.21203/rs.3.rs-6364616/v1), 2025-04-09
Supplement: Supplementary file 1 [file 28b811deb171235155a01898.pdf]

## DNA Polymorphism

Input Data File: C:\...\moussuto\AL-3.meg

Number of sequences: 29 Number of sequences used: 29

Selected region: 1-917 Number of sites: 917

Total number of sites (excluding sites with gaps / missing data): 390

Number of polymorphic (segregating) sites, S: 237

Total number of mutations, Eta: 256

Number of Haplotypes, h: 21

Haplotype (gene) diversity, Hd: 0.975

Variance of Haplotype diversity: 0.00023

Standard Deviation of Haplotype diversity: 0.015

Nucleotide diversity, Pi: 0.10724

Theta (per site) from Eta: 0.16715

Theta (per site) from S, Theta-W: 0.15474

Variance of theta (no recombination): 0.0023546

Standard deviation of theta (no recombination): 0.04852

Variance of theta (free recombination): 0.0001010

Standard deviation of theta (free recombination): 0.01005

## Finite Sites Model

Theta (per site) from Pi: 0.12514

Theta (per site) from S: 0.24054

Theta (per site) from Eta: 0.20618

Average number of nucleotide differences, k: 41.825

Stochastic variance of k (no recombination), Vst(k): 325.039

Sampling variance of k (no recombination), Vs(k): 24.366

Total variance of k (no recombination), V(k): 349.405

Stochastic variance of k (free recombination), Vst(k): 13.942

Sampling variance of k (free recombination), Vs(k): 0.996

Total variance of k (free recombination), V(k): 14.938

Theta (per sequence) from S, Theta-W: 60.349

Variance of theta (no recombination): 358.140

Variance of theta (free recombination): 15.367
