# Supplementary material for: First Report on the Molecular Phylogenetics and Population Genetics of Aedes Lineatopennis (Ludlow) in the World
Source: Research Square preprint supplement (doi:10.21203/rs.3.rs-6364616/v1), 2025-04-09
Supplement: Supplementary file 2 [file 93763f71e3b7aa2f90113ec1.pdf]

## Pairwise No. of Differences

Input Data File: C:\...\moussquto\AL-3.meg

Number of sequences: 29 Number of sequences used: 29

Selected region: 1-917 Number of sites: 917

Total number of sites (excluding sites with gaps / missing data): 390

Number of polymorphic (segregating) sites, S: 237

## Observed values:

Nucleotide diversity,  $\pi$ : 0.10724Average Number of Pairwise Differences,  $k$ : 41.825Observed variance of  $k$ : 4642.3767Observed C.V. of  $k$ : 1.6431Raggedness statistic  $r$ : 0.0152

Mean Absolute Error, MAE: 1.2278

Ramos-Onsins and Rozas,  $R_2$  statistic: 0.0868

## Expected values:

Expected Total variance of  $k$  (no recombination),  $V(k)$ : 349.405Expected C.V. of  $k$  (no recombination): 0.4469Expected Stochastic variance of  $k$  (no recombination),  $V_{st}(k)$ : 325.039Expected Sampling variance of  $k$  (no recombination),  $V_s(k)$ : 24.366Expected Total variance of  $k$  (free recombination),  $V(k)$ : 14.938Expected C.V. of  $k$  (free recombination): 0.0924Expected Stochastic variance of  $k$  (free recombination),  $V_{st}(k)$ : 13.942Expected Sampling variance of  $k$  (free recombination),  $V_s(k)$ : 0.996

## Parameters Estimation by letting Theta Final as infinite

Estimate of Theta Initial: 67.827

Estimate of Tau: 0.000

==== Expected Values for Constant Population Size =====
