# Supplementary material for: First Report on the Molecular Phylogenetics and Population Genetics of Aedes Lineatopennis (Ludlow) in the World
Source: Research Square preprint supplement (doi:10.21203/rs.3.rs-6364616/v1), 2025-04-09
Supplement: Supplementary file 3 [file f2fb01c4988c9a02cca6e8a3.docx]

|  | Aedes_lineatopennis-INDIA_(PQ788195) |
| --- | --- |
| Aedes_lineatopennis-INDIA_(PQ788195) |  |
| Aedes_lineatopennis-AUSTRALIA_(PP145264) | 0.1140215716 |
| Aedes_lineatopennis-AUSTRALIA_(PP145263) | 0.1140215716 |
| Aedes_lineatopennis-AUSTRALIA_(PP145262) | 0.1140215716 |
| Aedes_lineatopennis-AUSTRALIA_(PP145261) | 0.1448382126 |
| Aedes_lineatopennis-AUSTRALIA_(PP145260) | 0.1448382126 |
| Aedes_lineatopennis-THAILAND_(OK413077) | 0.0000000000 |
| Aedes_lineatopennis-THAILAND_(OK413076) | 0.0000000000 |
| Aedes_lineatopennis-THAILAND_(OK413075) | 0.0000000000 |
| Aedes_lineatopennis-THAILAND_(OK413074) | 0.0000000000 |
| Aedes_lineatopennis-THAILAND_(OL742812) | 0.0000000000 |
| Aedes_lineatopennis-THAILAND_(OL742811) | 0.0000000000 |
| Aedes_lineatopennis-THAILAND_(OL742810) | 0.0000000000 |
| Aedes_lineatopennis-THAILAND_(OL742809) | 0.0000000000 |
| Aedes_lineatopennis-CHINA_(OP279053) | 0.0000000000 |
| Aedes_lineatopennis-CHINA_(MF179166) | 0.0000000000 |
| Aedes_lineatopennis-CHINA_(MF179165) | 0.0000000000 |
| Aedes_lineatopennis-CHINA_(MF179164) | 0.0000000000 |
| Aedes_lineatopennis-CHINA_(MF179163) | 0.0000000000 |
| Aedes_lineatopennis-CHINA_(MF179162) | 0.0000000000 |
| Aedes_lineatopennis-KOREA_(KT358468) | 0.0000000000 |
| Aedes_lineatopennis-KOREA_(KT358467) | 0.0061633282 |
| Aedes_lineatopennis-KOREA_(KT358466) | 0.0061633282 |
| Aedes_lineatopennis-JAPAN_(AB738145) | 0.0000000000 |
| Aedes_lineatopennis-JAPAN_(AB738144) | 0.0030816641 |
| Aedes_lineatopennis-UK_(HQ398956) | 1.3087557604 |
| Aedes_lineatopennis-UK_(HQ398955) | 1.2427035330 |
| Aedes_lineatopennis-UK_(HQ398910) | 0.0000000000 |
| Aedes_lineatopennis-UK_(HQ398909) | 0.0000000000 |

| 0.0000000000 |  |
| --- | --- |
| 0.0000000000 | 0.0000000000 |
| 0.0000000000 | 0.0000000000 |
| 0.0000000000 | 0.0000000000 |
| 0.1269113150 | 0.1269113150 |
| 0.1055045872 | 0.1055045872 |
| 0.1009174312 | 0.1009174312 |
| 0.1009174312 | 0.1009174312 |
| 0.0389610390 | 0.0389610390 |
| 0.0411255411 | 0.0411255411 |
| 0.0281385281 | 0.0281385281 |
| 0.0476190476 | 0.0476190476 |
| 0.0771144279 | 0.0771144279 |
| 0.1167434716 | 0.1167434716 |
| 0.1167434716 | 0.1167434716 |
| 0.1367127496 | 0.1367127496 |
| 0.1213517665 | 0.1213517665 |
| 0.1167434716 | 0.1167434716 |
| 0.1598173516 | 0.1598173516 |
| 0.0791476408 | 0.0791476408 |
| 0.0791476408 | 0.0791476408 |
| 0.1050228311 | 0.1050228311 |
| 0.1811263318 | 0.1811263318 |
| 1.2899224806 | 1.2899224806 |
| 1.2883720930 | 1.2883720930 |
| 0.0455635492 | 0.0455635492 |
| 0.0608828006 | 0.0608828006 |

| 0.0000000000 |  |
| --- | --- |
| 0.0000000000 | 0.0000000000 |
| 0.1269113150 | 0.1590214067 |
| 0.1055045872 | 0.1345565749 |
| 0.1009174312 | 0.1299694190 |
| 0.1009174312 | 0.1299694190 |
| 0.0389610390 | 0.0649350649 |
| 0.0411255411 | 0.0692640693 |
| 0.0281385281 | 0.0541125541 |
| 0.0476190476 | 0.0757575758 |
| 0.0771144279 | 0.1119402985 |
| 0.1167434716 | 0.1505376344 |
| 0.1167434716 | 0.1505376344 |
| 0.1367127496 | 0.1689708141 |
| 0.1213517665 | 0.1551459293 |
| 0.1167434716 | 0.1505376344 |
| 0.1598173516 | 0.1933028919 |
| 0.0791476408 | 0.1035007610 |
| 0.0791476408 | 0.1035007610 |
| 0.1050228311 | 0.1339421613 |
| 0.1811263318 | 0.2161339422 |
| 1.2899224806 | 1.3348837209 |
| 1.2883720930 | 1.3395348837 |
| 0.0455635492 | 0.0767386091 |
| 0.0608828006 | 0.0852359209 |

| 0.1590214067 |  |
| --- | --- |
| 0.1345565749 | 0.0000000000 |
| 0.1299694190 | 0.0000000000 |
| 0.1299694190 | 0.0000000000 |
| 0.0649350649 | 0.0000000000 |
| 0.0692640693 | 0.0000000000 |
| 0.0541125541 | 0.0000000000 |
| 0.0757575758 | 0.0000000000 |
| 0.1119402985 | 0.0000000000 |
| 0.1520737327 | 0.0000000000 |
| 0.1520737327 | 0.0000000000 |
| 0.1689708141 | 0.0000000000 |
| 0.1566820276 | 0.0000000000 |
| 0.1520737327 | 0.0000000000 |
| 0.1933028919 | 0.0000000000 |
| 0.1035007610 | 0.0107033639 |
| 0.1035007610 | 0.0107033639 |
| 0.1339421613 | 0.0000000000 |
| 0.2161339422 | 0.0061162080 |
| 1.3317829457 | 1.4294385432 |
| 1.3364341085 | 1.3459787557 |
| 0.0767386091 | 0.0000000000 |
| 0.0852359209 | 0.0000000000 |

| 0.0000000000 |  |
| --- | --- |
| 0.0000000000 | 0.0000000000 |
| 0.0000000000 | 0.0000000000 |
| 0.0000000000 | 0.0000000000 |
| 0.0000000000 | 0.0000000000 |
| 0.0000000000 | 0.0000000000 |
| 0.0000000000 | 0.0000000000 |
| 0.0000000000 | 0.0000000000 |
| 0.0000000000 | 0.0000000000 |
| 0.0000000000 | 0.0000000000 |
| 0.0000000000 | 0.0000000000 |
| 0.0000000000 | 0.0000000000 |
| 0.0015290520 | 0.0061162080 |
| 0.0015290520 | 0.0091743119 |
| 0.0015290520 | 0.0091743119 |
| 0.0000000000 | 0.0000000000 |
| 0.0061162080 | 0.0122324159 |
| 1.5447647951 | 1.4370257967 |
| 1.4673748103 | 1.3596358118 |
| 0.0000000000 | 0.0000000000 |
| 0.0000000000 | 0.0000000000 |

| 0.0000000000 |  |
| --- | --- |
| 0.0000000000 | 0.0000000000 |
| 0.0000000000 | 0.0000000000 |
| 0.0000000000 | 0.0000000000 |
| 0.0000000000 | 0.0000000000 |
| 0.0000000000 | 0.0000000000 |
| 0.0000000000 | 0.0000000000 |
| 0.0000000000 | 0.0000000000 |
| 0.0000000000 | 0.0000000000 |
| 0.0000000000 | 0.0000000000 |
| 0.0061162080 | 0.0000000000 |
| 0.0091743119 | 0.0021645022 |
| 0.0091743119 | 0.0021645022 |
| 0.0000000000 | 0.0000000000 |
| 0.0122324159 | 0.0021645022 |
| 1.4370257967 | 0.8927125506 |
| 1.3596358118 | 0.8076923077 |
| 0.0000000000 | 0.0000000000 |
| 0.0000000000 | 0.0000000000 |

| 0.0000000000 |  |
| --- | --- |
| 0.0000000000 | 0.0014164306 |
| 0.0000000000 | 0.0000000000 |
| 0.0000000000 | 0.0000000000 |
| 0.0000000000 | 0.0000000000 |
| 0.0000000000 | 0.0000000000 |
| 0.0000000000 | 0.0000000000 |
| 0.0000000000 | 0.0000000000 |
| 0.0000000000 | 0.0064935065 |
| 0.0086580087 | 0.0194805195 |
| 0.0086580087 | 0.0194805195 |
| 0.0000000000 | 0.0000000000 |
| 0.0000000000 | 0.0129870130 |
| 0.8846153846 | 0.8036437247 |
| 0.7975708502 | 0.7226720648 |
| 0.0000000000 | 0.0000000000 |
| 0.0000000000 | 0.0000000000 |

| 0.0000000000 |  |
| --- | --- |
| 0.0000000000 | 0.0000000000 |
| 0.0000000000 | 0.0000000000 |
| 0.0000000000 | 0.0000000000 |
| 0.0000000000 | 0.0000000000 |
| 0.0000000000 | 0.0000000000 |
| 0.0000000000 | 0.0000000000 |
| 0.0000000000 | 0.0024875622 |
| 0.0000000000 | 0.0024875622 |
| 0.0000000000 | 0.0000000000 |
| 0.0000000000 | 0.0000000000 |
| 0.9736842105 | 1.3971631206 |
| 0.8866396761 | 1.2931442080 |
| 0.0000000000 | 0.0000000000 |
| 0.0000000000 | 0.0000000000 |

| 0.0000000000 |  |
| --- | --- |
| 0.0000000000 | 0.0000000000 |
| 0.0030721966 | 0.0030721966 |
| 0.0000000000 | 0.0000000000 |
| 0.0000000000 | 0.0000000000 |
| 0.0000000000 | 0.0000000000 |
| 0.0000000000 | 0.0000000000 |
| 0.0000000000 | 0.0000000000 |
| 0.0000000000 | 0.0000000000 |
| 1.0485133020 | 1.0485133020 |
| 0.9749608764 | 0.9749608764 |
| 0.0000000000 | 0.0000000000 |
| 0.0000000000 | 0.0000000000 |

| 0.0000000000 |  |
| --- | --- |
| 0.0000000000 | 0.0000000000 |
| 0.0000000000 | 0.0000000000 |
| 0.0000000000 | 0.0000000000 |
| 0.0000000000 | 0.0000000000 |
| 0.0000000000 | 0.0000000000 |
| 0.0000000000 | 0.0000000000 |
| 1.2957746479 | 1.2519561815 |
| 1.2206572770 | 1.1721439750 |
| 0.0000000000 | 0.0000000000 |
| 0.0000000000 | 0.0000000000 |

| 0.0000000000 |  |
| --- | --- |
| 0.0000000000 | 0.0045662100 |
| 0.0000000000 | 0.0045662100 |
| 0.0000000000 | 0.0015220700 |
| 0.0000000000 | 0.0000000000 |
| 1.1486697966 | 1.3612403101 |
| 1.0719874804 | 1.2821705426 |
| 0.0000000000 | 0.0000000000 |
| 0.0000000000 | 0.0060882801 |

| 0.0000000000 |  |
| --- | --- |
| 0.0015220700 | 0.0015220700 |
| 0.0015220700 | 0.0015220700 |
| 1.4728682171 | 1.4728682171 |
| 1.4093023256 | 1.4093023256 |
| 0.0023980815 | 0.0023980815 |
| 0.0000000000 | 0.0000000000 |

| 0.0060882801 |  |
| --- | --- |
| 1.2062015504 | 1.3984496124 |
| 1.1410852713 | 1.3147286822 |
| 0.0000000000 | 0.0000000000 |
| 0.0000000000 | 0.0182648402 |

| 0.0000000000 |  |
| --- | --- |
| 0.5661764706 | 0.4852941176 |
| 1.1906976744 | 1.1364341085 |

0.0000000000

inbasecompositionbiasesthanexpectedbasedonevolutionarydivergencebetweensequencesandbychancealone.Thisanalysisinvolved29nucleotidesequences.Therewereatotalof917positionsinthefinaldataset.EvolutionaryanalyseswereconductedinMEGA11[2]

1. KumarS.andGadagkarS.R.(2001).DisparityIndex:Asimplestatistictomeasureandtestthehomogeneityofsubstitutionpatternsbetweenmolecularsequences.Genetics158:1321-1327.
2. TamuraK.,StecherG.,andKumarS.(2021).MEGA11:MolecularEvolutionaryGeneticsAnalysisVersion

11.MolecularBiologyandEvolutionhttps://doi.org/10.1093/molbev/msab120.

Disclaimer:Although utmostcarehasbeentaken to ensure thecorrectnessofthe caption,the captiontextisprovided "asis" withoutanywarranty ofany kind.Authorsadvisethe user to carefullycheckthecaption prior toitsuse forany purposeand reportany errorsorproblemsto the authorsimmediately (www.megasoftware.net).In noeventshallthe authorsand theiremployersbeliableforanydamages,includingbutnotlimitedto special,consequential,or otherdamages.Authorsspecifically disclaimallotherwarrantiesexpressed orimplied,includingbutnotlimitedto the determinationofsuitabilityofthiscaption textfor a specificpurpose,use,orapplication.
