# Supplementary figures and images for: First Report on the Molecular Phylogenetics and Population Genetics of Aedes Lineatopennis (Ludlow) in the World
Source: Research Square preprint supplement (doi:10.21203/rs.3.rs-6364616/v1), 2025-04-09

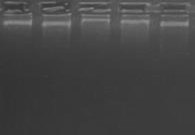
4

**1 2 3 4 5**

**GENOMIC DNAGELIMAGE**


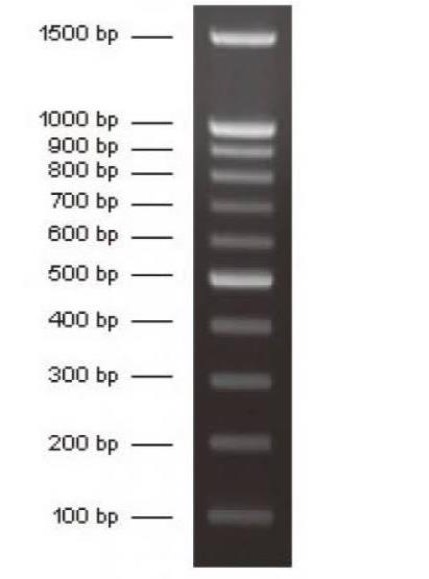

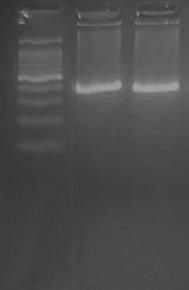


L 1 2

**PCR AMPLIFIEDGEL IMAGE**

Supplement: Supplementary file 1 [file 29c1247df01d983d2297f703.docx]

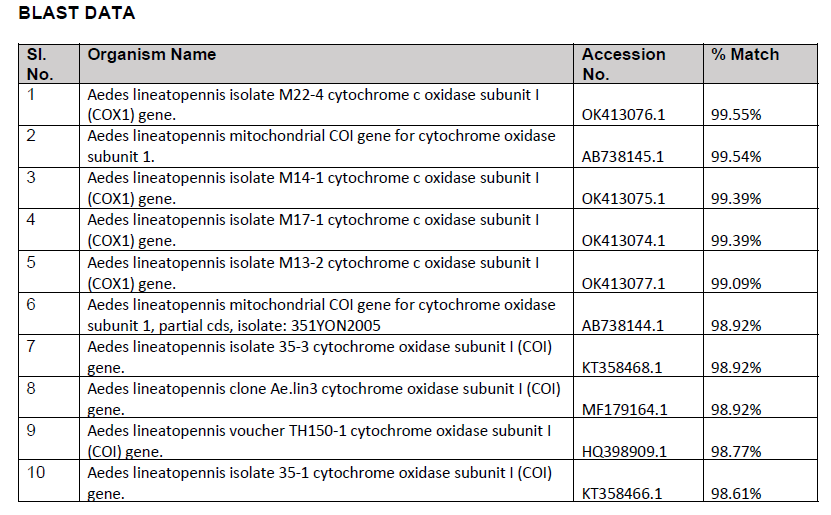

Supplement: Supplementary file 2 [file bfd03b77464dfcdae33839ce.docx]
